# Supplementary material
Source: Springer Nature journal article supplement (https://www.springerprofessional.de/resource/supplementary/13638_2011_21_MOESM19_ESM.pdf/11897282)

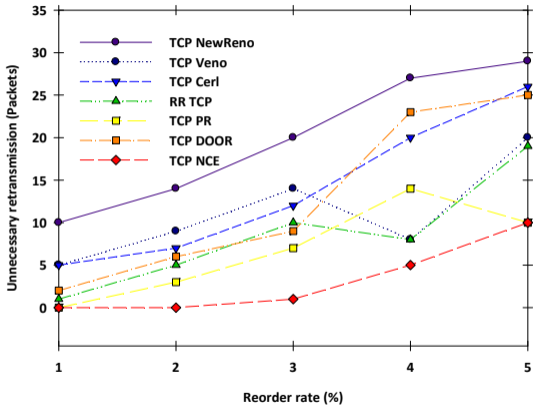

Supplement: MOESM19 [file 11897282]
